# Supplementary material for: Developing a transwell millifluidic device for studying blood–brain barrier endothelium
Source: Royal Society of Chemistry journal article supplement (doi:10.1039/d2lc00657j), 2022-01-01
Supplement: d2lc00657j4.pdf [file d2lc00657j4.pdf]

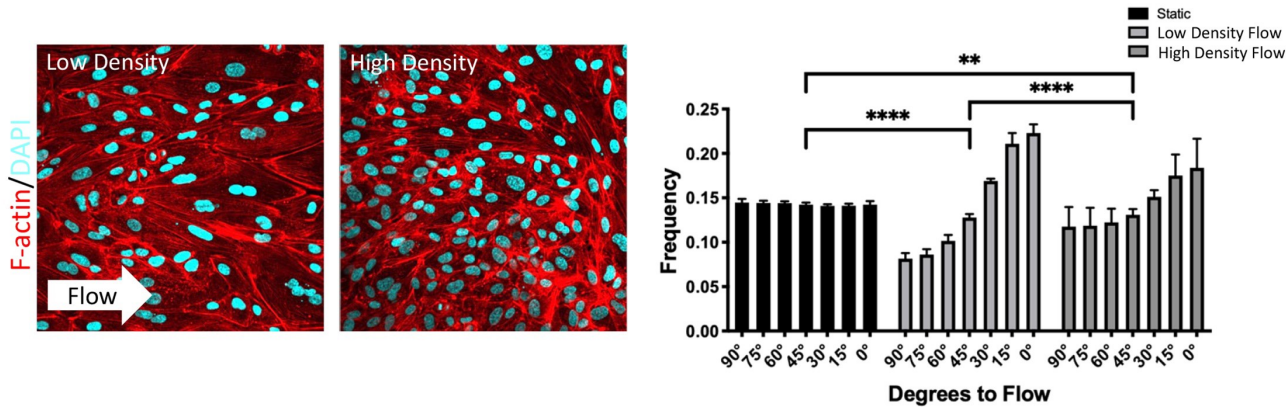

| Cell Orientation Angle | Static      | Low Density Flow (~562 cells/mm <sup>2</sup> ) | High Density Flow (~1174 cells/mm <sup>2</sup> ) |
|------------------------|-------------|------------------------------------------------|--------------------------------------------------|
| 0°                     | 14.2 ± 0.4% | 22.3 ± 1.0%                                    | 18.4 ± 3.3%                                      |
| 15°                    | 14.1 ± 0.2% | 21.2 ± 1.2%                                    | 17.5 ± 2.4%                                      |
| 30°                    | 14.1 ± 0.2% | 16.9 ± 0.2%                                    | 15.1 ± 0.7%                                      |
| 45°                    | 14.2 ± 0.2% | 12.8 ± 0.4%                                    | 13.1 ± 0.6%                                      |
| 60°                    | 14.4 ± 0.2% | 10.2 ± 0.7%                                    | 12.2 ± 1.5%                                      |
| 75°                    | 14.4 ± 0.2% | 8.6 ± 0.6%                                     | 11.9 ± 2.0%                                      |
| 90°                    | 14.5 ± 0.4% | 8.1 ± 0.6%                                     | 11.8 ± 2.2%                                      |

| Cell Orientation Angle | Static vs. Low Density Flow |         | Static vs. High Density Flow |         | Low Density Flow vs. High Density Flow |         |        |
|------------------------|-----------------------------|---------|------------------------------|---------|----------------------------------------|---------|--------|
|                        | Statistically Significant?  | P-value | Statistically Significant?   | P-value | Statistically Significant?             | P-value |        |
| Multiple Comparisons   | 0°                          | Yes     | <0.0001                      | Yes     | 0.0063                                 | Yes     | 0.0306 |
|                        | 15°                         | Yes     | <0.0001                      | Yes     | 0.0295                                 | No      | 0.0530 |
|                        | 30°                         | No      | 0.0872                       | No      | 0.7183                                 | No      | 0.4668 |
|                        | 45°                         | No      | 0.5033                       | No      | 0.6611                                 | No      | 0.9740 |
|                        | 60°                         | Yes     | 0.0047                       | No      | 0.2314                                 | No      | 0.3543 |
|                        | 75°                         | Yes     | <0.0001                      | No      | 0.1330                                 | No      | 0.0871 |
|                        | 90°                         | Yes     | <0.0001                      | No      | 0.1043                                 | No      | 0.0506 |
