# Supplementary material for: Developing a transwell millifluidic device for studying blood–brain barrier endothelium
Source: Royal Society of Chemistry journal article supplement (doi:10.1039/d2lc00657j), 2022-01-01
Supplement: d2lc00657j5.pdf [file d2lc00657j5.pdf]

| <b>Cell Type</b> | <b>Shear Stress Range</b>                 | <b>References</b> |
|------------------|-------------------------------------------|-------------------|
| b.End.3          | 15 dynes/cm <sup>2</sup>                  | 117               |
| b.End.3          | 5 dynes/cm <sup>2</sup>                   | 61                |
| Capillaries      | 10-26 dynes/cm <sup>2</sup> based on size | 118               |
| Capillaries      | 3-20 dynes/cm <sup>2</sup>                | 119               |
| Capillaries      | 1-5 dynes/cm <sup>2</sup>                 | 120               |
| Capillaries      | ~ 40 dynes/cm <sup>2</sup>                | 121               |
| Capillaries      | 15.4 dynes/cm <sup>2</sup> avg.           | 103               |
| HBMECs           | 6.2 dynes/cm <sup>2</sup>                 | 71                |
| HBMECs           | 50 dynes/cm <sup>2</sup>                  | 38                |
| dHBMECs          | 4 & 12 dynes/cm <sup>2</sup>              | 49                |
| hCMEC            | 5.8 dynes/cm <sup>2</sup>                 | 122               |
| hCMEC            | 0.15 dynes/cm <sup>2</sup>                | 123               |
| HCMEC/D3         | 10 dynes/cm <sup>2</sup>                  | 117               |
| gBMEC            | 2 dynes/cm <sup>2</sup>                   | 61                |
