# Supplementary material for: Developing a transwell millifluidic device for studying blood–brain barrier endothelium
Source: Royal Society of Chemistry journal article supplement (doi:10.1039/d2lc00657j), 2022-01-01
Supplement: d2lc00657j6.pdf [file d2lc00657j6.pdf]

**A**

| Protein     | E             | EP            | EA            | EPA           |
|-------------|---------------|---------------|---------------|---------------|
| ZO-1        | 1.000 ± 0.000 | 1.254 ± 0.168 | 0.901 ± 0.064 | 0.862 ± 0.092 |
| Claudin-5   | 1.000 ± 0.000 | 1.536 ± 0.246 | 1.353 ± 0.271 | 1.422 ± 0.431 |
| Occludin    | 1.000 ± 0.000 | 0.588 ± 0.035 | 0.856 ± 0.096 | 0.568 ± 0.073 |
| VE-Cadherin | 1.000 ± 0.000 | 0.923 ± 0.159 | 0.867 ± 0.163 | 0.787 ± 0.069 |
| Caveolin-1  | 1.000 ± 0.000 | 0.773 ± 0.058 | 0.901 ± 0.062 | 0.958 ± 0.145 |

**B**

| Protein     | E vs. EP                   |         | E vs. EA                   |         | E vs. EPA                  |         | EP vs. EA                  |         | EP vs. EPA                 |         | EA vs. EPA                 |         |
|-------------|----------------------------|---------|----------------------------|---------|----------------------------|---------|----------------------------|---------|----------------------------|---------|----------------------------|---------|
|             | Statistically Significant? | P-value |
| ZO-1        | Yes                        | 0.3161  | No                         | 0.9333  | No                         | 0.8429  | No                         | 0.1740  | No                         | 0.1125  | No                         | 0.9968  |
| Claudin-5   | Yes                        | 0.5499  | No                         | 0.8143  | No                         | 0.7201  | No                         | 0.9673  | No                         | 0.9917  | No                         | 0.9981  |
| Occludin    | Yes                        | 0.0027  | No                         | 0.4020  | Yes                        | 0.0019  | Yes                        | 0.0457  | No                         | 0.9962  | Yes                        | 0.0313  |
| VE-Cadherin | No                         | 0.9675  | No                         | 0.8585  | No                         | 0.6003  | No                         | 0.9865  | No                         | 0.8481  | No                         | 0.9627  |
| Caveolin-1  | No                         | 0.2755  | No                         | 0.8397  | No                         | 0.9846  | No                         | 0.7085  | No                         | 0.4364  | No                         | 0.9623  |
