# Supplementary material for: Developing a transwell millifluidic device for studying blood–brain barrier endothelium
Source: Royal Society of Chemistry journal article supplement (doi:10.1039/d2lc00657j), 2022-01-01
Supplement: d2lc00657j7.pdf [file d2lc00657j7.pdf]

|           | EPA Static    | EPA Flow      | EPA Static vs. Flow        |         | E Static      | E Flow        | E Static vs. Flow          |         |
|-----------|---------------|---------------|----------------------------|---------|---------------|---------------|----------------------------|---------|
|           |               |               | Statistically Significant? | P-value |               |               | Statistically Significant? | P-Value |
| ZO-1      | 1.000 ± 0.000 | 1.222 ± 0.058 | Yes                        | 0.0049  | 1.000 ± 0.000 | 1.019 ± 0.136 | No                         | 0.8951  |
| Claudin-5 | 1.000 ± 0.000 | 0.753 ± 0.044 | Yes                        | 0.0005  | 1.000 ± 0.000 | 0.541 ± 0.093 | Yes                        | 0.0012  |
| Occludin  | 1.000 ± 0.000 | 0.559 ± 0.052 | Yes                        | <0.0001 | 1.000 ± 0.000 | 0.458 ± 0.063 | Yes                        | <0.0001 |
