# Supplementary figures and images for: Developing a transwell millifluidic device for studying blood–brain barrier endothelium
Source: Royal Society of Chemistry journal article supplement (doi:10.1039/d2lc00657j), 2022-01-01

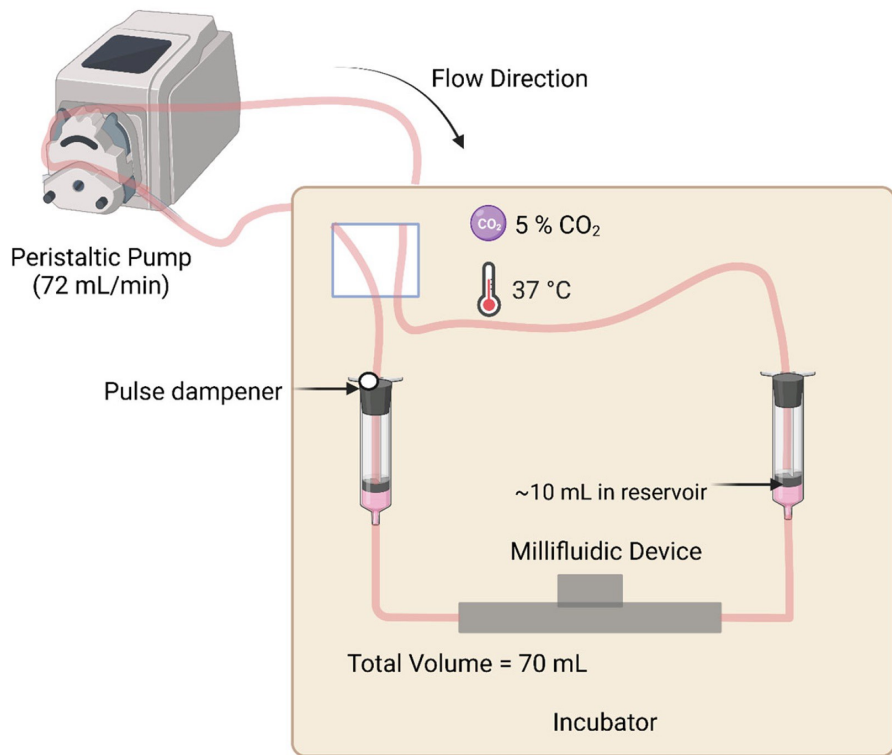

Supplement: d2lc00657j2.pdf [file d2lc00657j2.pdf]

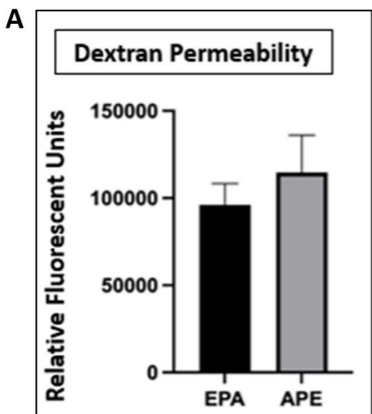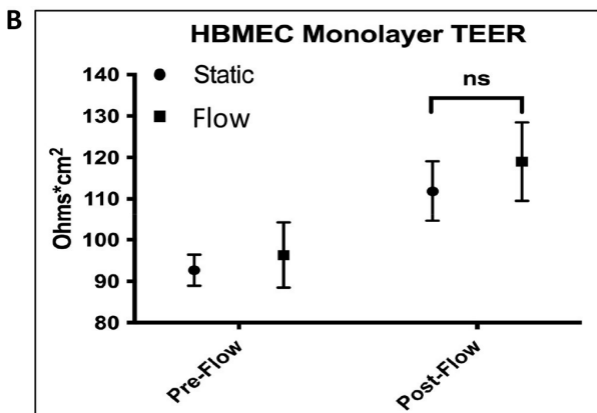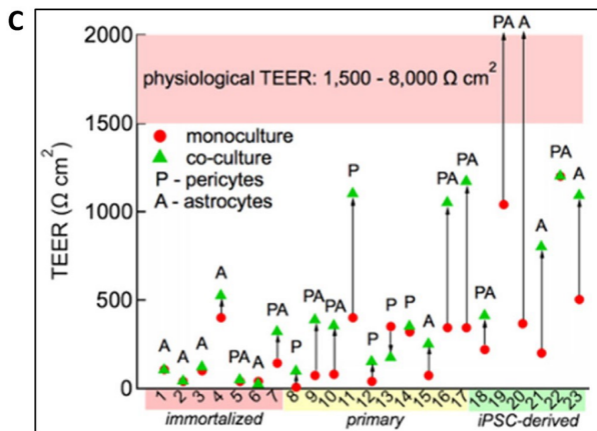

Supplement: d2lc00657j3.pdf [file d2lc00657j3.pdf]
